# Supplementary material
Source: PubMed Central journal article supplement (PMC5371393)

## SUPPORTING INFORMATION

### Exploiting Protein Conformational Change to Optimize Adenosine-Derived Inhibitors of HSP70

Matthew D. Cheeseman,<sup>1</sup> Isaac M. Westwood,<sup>1,2</sup> Olivier Barbeau,<sup>1</sup> Martin Rowlands,<sup>1</sup> Sarah Dobson,<sup>1,2</sup> Alan M. Jones,<sup>1</sup> Fiona Jeganathan,<sup>1</sup> Rosemary Burke,<sup>1</sup> Nadia Kadi,<sup>1</sup> Paul Workman,<sup>1</sup> Ian Collins,<sup>1</sup> Rob L. M. van Montfort,<sup>1,2</sup> Keith Jones<sup>1,\*</sup>

<sup>1</sup> Cancer Research UK Cancer Therapeutics Unit at The Institute of Cancer Research, London SW7 3RP, U.K.

<sup>2</sup> Division of Structural Biology at The Institute of Cancer Research, London SW7 3RP, U.K.

#### Table of Contents

Commercially available adenosine analogues: S1-S3

Supporting Information Table S1: S4

NMR spectra of final compounds: S5-S11

Representative SPR sensorgrams and binding curves: S12-S13

Fo-Fc electron density figures for ligand-bound HSP72 structures: S14

Data collection and refinement statistics for HSP72 co-crystal structures with ligands: S15-S16

Co-crystal structure pictures highlighting key residues and overlays: S17-S19

#### Commercially available adenosine analogues

The following compounds were purchased from commercial suppliers and used without further purification.

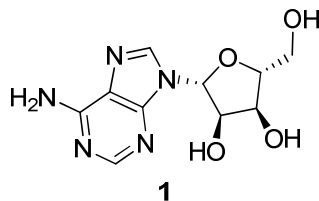

Adenosine **1** was purchased from Sigma-Aldrich

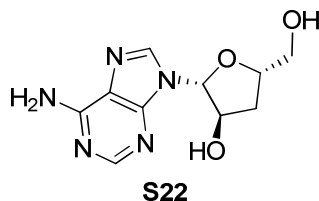

Cordycepin **S22** was purchased from Sigma-Aldrich

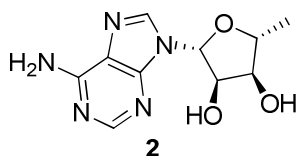

5'-Deoxyadenosine **2** was purchased from Carbosynth Limited

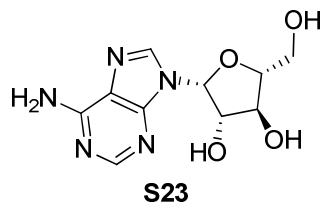

*Vidarabine S23 was purchased from Sigma-Aldrich*

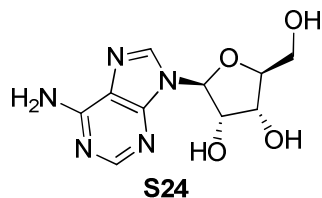

*L-Adenosine S24 was purchased from Carbosynth Limited*

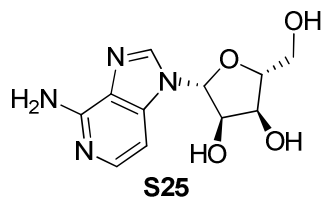

*3-Deazaadenosine S26 was purchased from Carbosynth Limited*

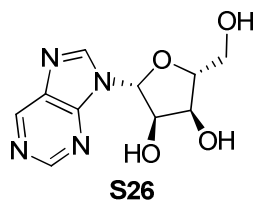

*Nebularine S27 was purchased from Carbosynth Limited*

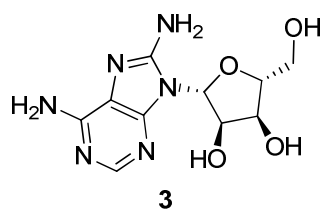

*8-Aminoadenosine 3 was purchased from Carbosynth Limited*

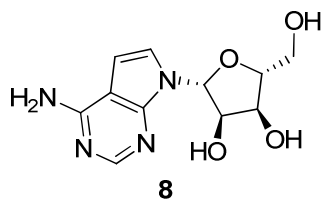

*Tubercidin 8 was purchased from Sigma-Aldrich*

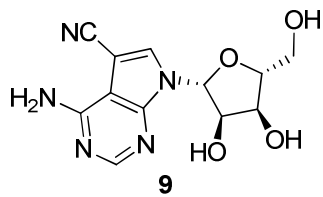

**9**

*Toyocamycin 9 was purchased from Sigma-Aldrich*

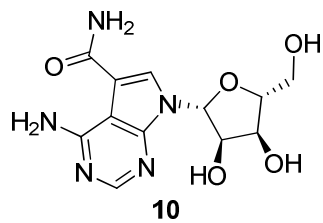

**10**

*Sangivamycin 10 was purchased from Sigma-Aldrich*

Supporting Information Table S1

| Entry | Compd.     | Structure                                                                           | $pK_D \pm \text{SEM}^a$ | $K_D (\mu\text{M})^b$ |
|-------|------------|-------------------------------------------------------------------------------------|-------------------------|-----------------------|
| 1     | <b>1</b>   | 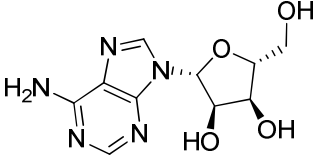   | $3.95 \pm 0.01$         | 110                   |
| 2     | <b>S23</b> |    | $<3.00$                 | $>1000$               |
| 3     | <b>2</b>   |    | $3.88 \pm 0.02$         | 130                   |
| 4     | <b>S24</b> |   | $<3.00$                 | $>1000$               |
| 5     | <b>S25</b> |  | $<3.00$                 | $>1000$               |
| 6     | <b>S26</b> |  | $<3.00$                 | $>1000$               |
| 7     | <b>S27</b> |  | $<3.00$                 | $>1000$               |

<sup>a</sup>All results are quoted as the geometric mean  $\pm$  SEM of 3 independent experiments unless otherwise stated,  $pK_D = -\log_{10}(K_D(\mu\text{M}) \cdot 10^{-6})$ . <sup>b</sup>All values are quoted to 2 significant figures.

## NMR Spectra of final compounds

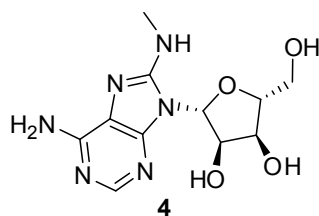

*(2R,3R,4S,5R)-2-(6-amino-8-(methylamino)-9H-purin-9-yl)-5-(hydroxymethyl)tetrahydrofuran-3,4-diol 4*

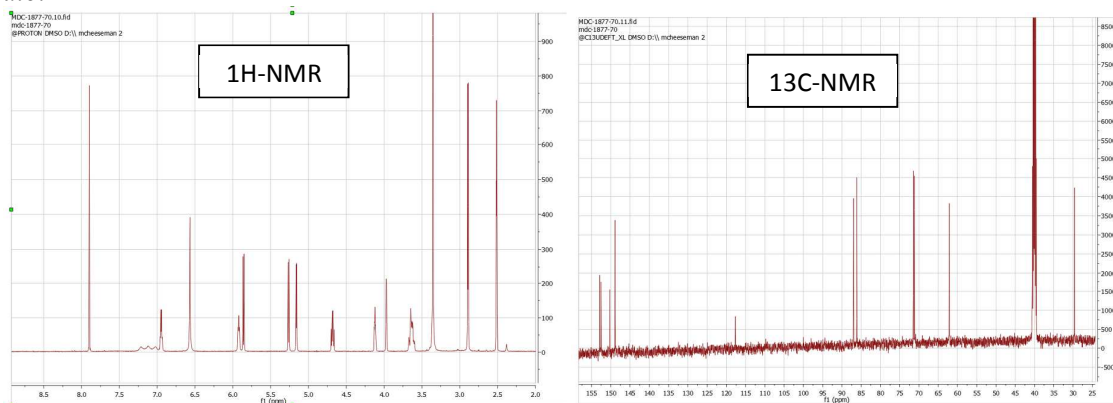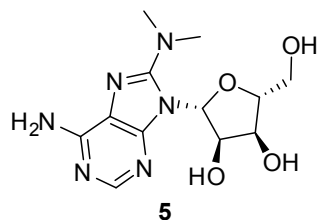

*(2R,3R,4S,5R)-2-(6-amino-8-(dimethylamino)-9H-purin-9-yl)-5-(hydroxymethyl)tetrahydrofuran-3,4-diol 5*

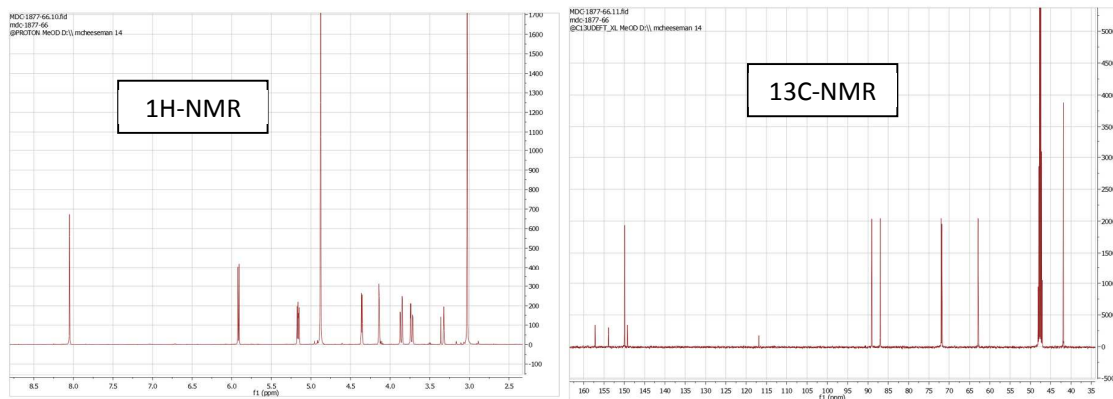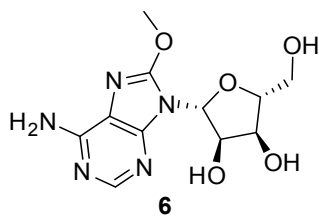

*(2R,3R,4S,5R)-2-(6-amino-8-methoxy-9H-purin-9-yl)-5-(hydroxymethyl)tetrahydrofuran-3,4-diol 6*

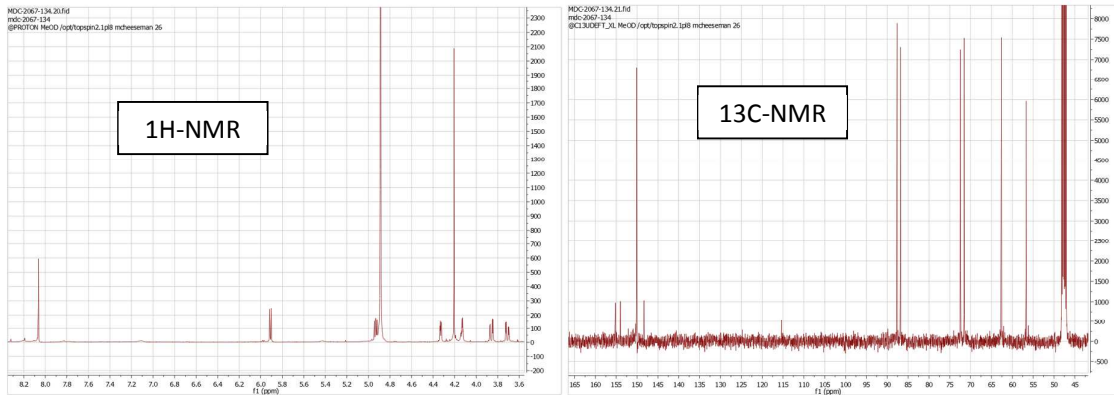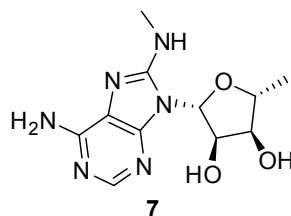

*(2R,3R,4S,5R)-2-(6-amino-8-(methylamino)-9H-purin-9-yl)-5-methyltetrahydrofuran-3,4-diol 7*

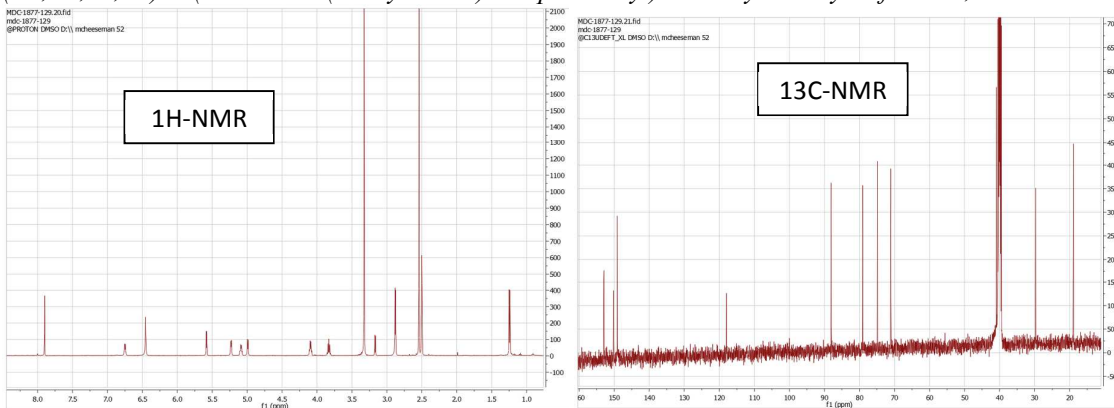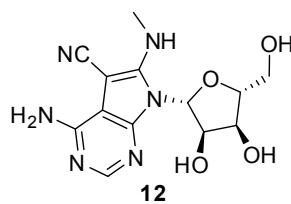

*4-amino-7-((2R,3R,4S,5R)-3,4-dihydroxy-5-(hydroxymethyl)tetrahydrofuran-2-yl)-6-(methylamino)-7H-pyrrolo[2,3-d]pyrimidine-5-carbonitrile 12*

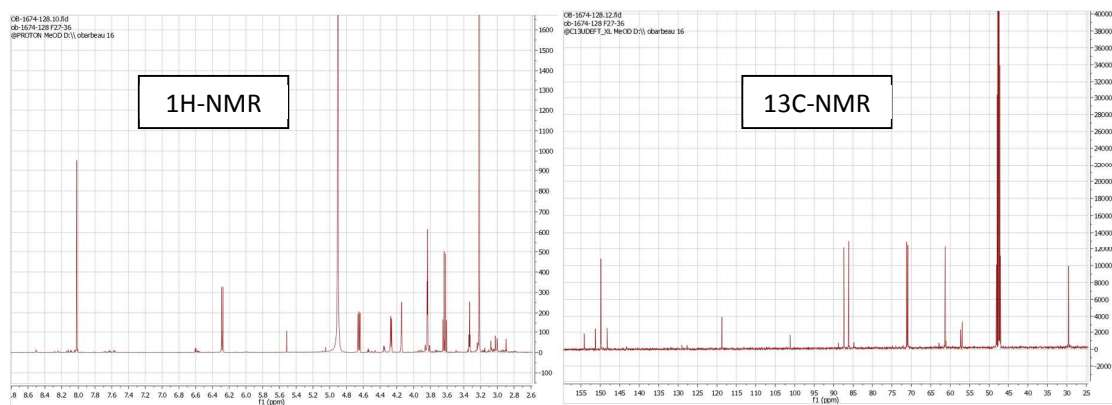

*4-amino-7-((2R,3R,4S,5R)-3,4-dihydroxy-5-(hydroxymethyl)tetrahydrofuran-2-yl)-6-(methylamino)-7H-pyrrolo[2,3-d]pyrimidine-5-carboxamide* **13**

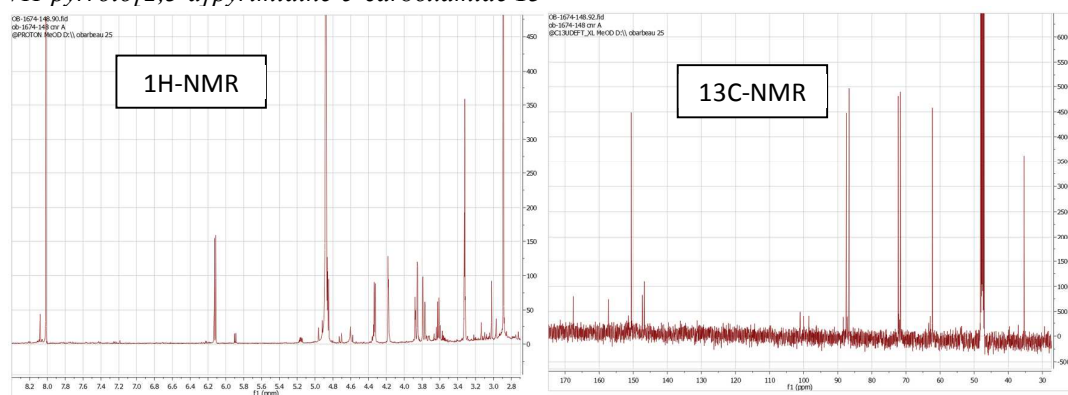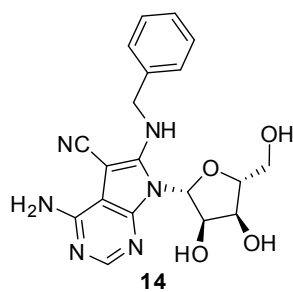

*4-amino-6-(benzylamino)-7-((2R,3R,4S,5R)-3,4-dihydroxy-5-(hydroxymethyl)tetrahydrofuran-2-yl)-7H-pyrrolo[2,3-d]pyrimidine-5-carbonitrile* **14**

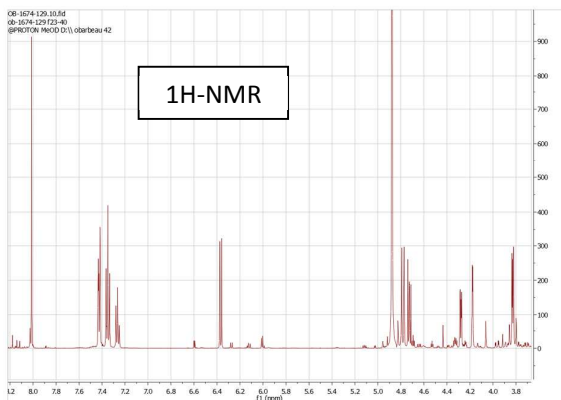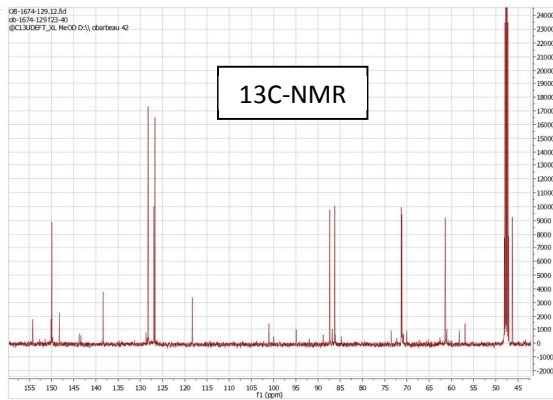

*(2R,3R,4S,5R)*-2-(6-amino-8-(benzylamino)-9H-purin-9-yl)-5-(hydroxymethyl)tetrahydrofuran-3,4-diol **15**

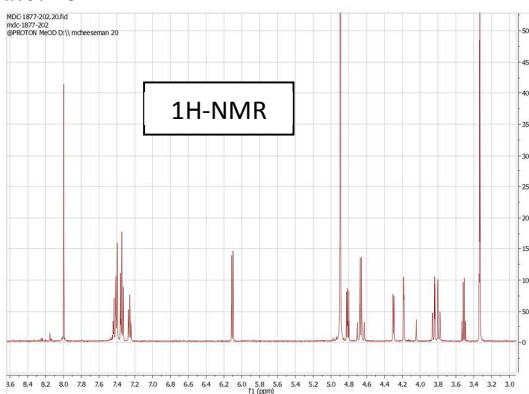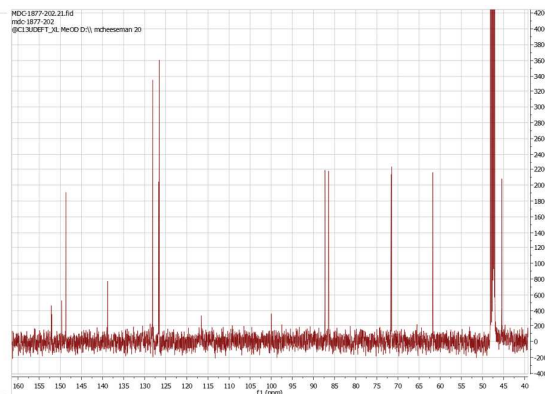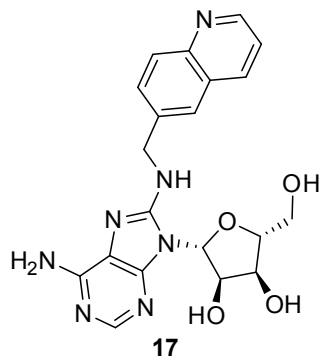

*(2R,3R,4S,5R)*-2-(6-amino-8-((quinolin-6-ylmethyl)amino)-9H-purin-9-yl)-5-(hydroxymethyl)tetrahydrofuran-3,4-diol **17**



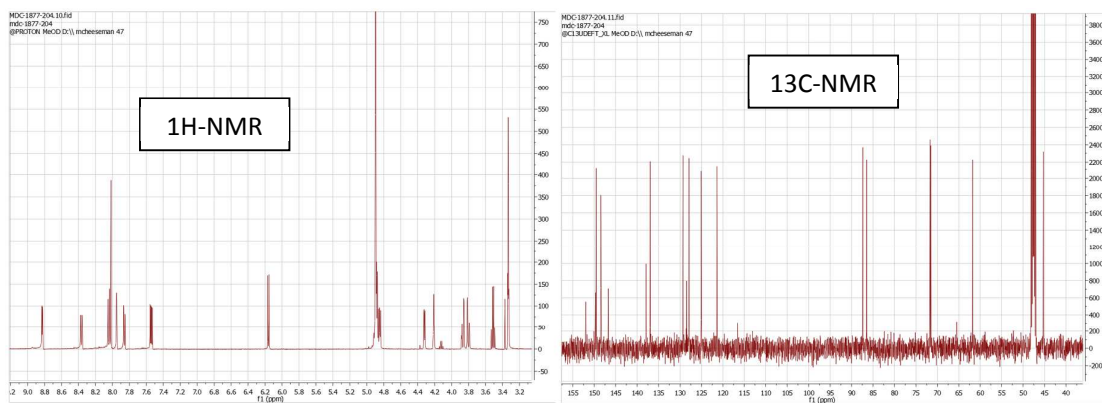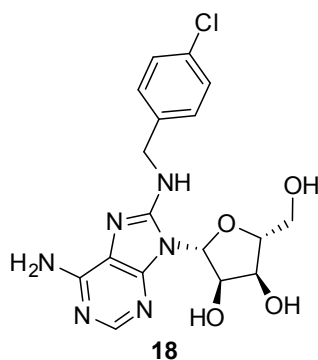

*(2R,3R,4S,5R)-2-(6-amino-8-((4-chlorobenzyl)amino)-9H-purin-9-yl)-5-(hydroxymethyl)tetrahydrofuran-3,4-diol* **18**

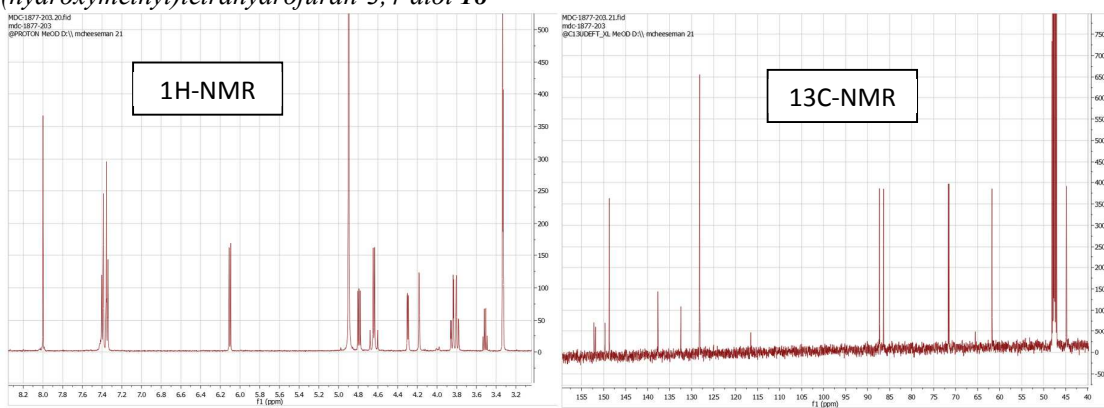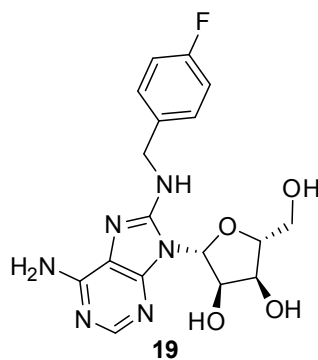

*(2R,3R,4S,5R)-2-(6-amino-8-((4-fluorobenzyl)amino)-9H-purin-9-yl)-5-(hydroxymethyl)tetrahydrofuran-3,4-diol* **19**

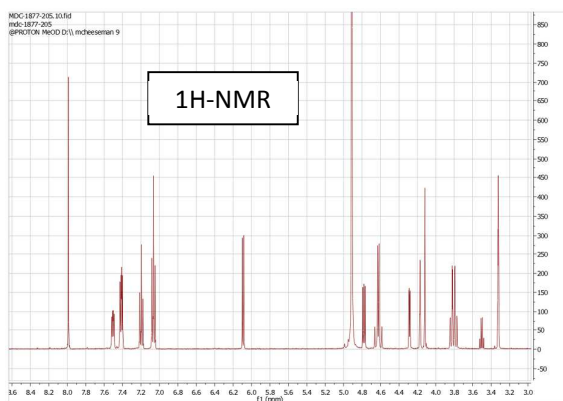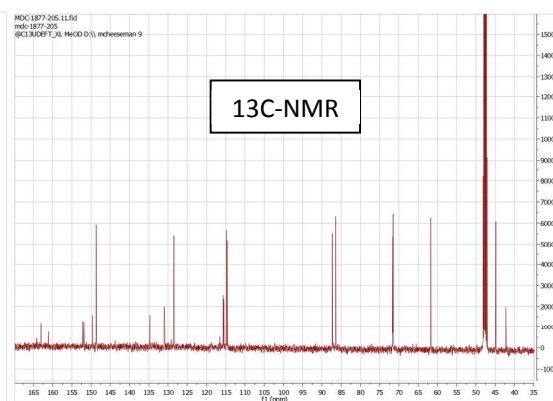

*(2R,3R,4S,5R)*-2-(6-amino-8-((4-methylbenzyl)amino)-9H-purin-9-yl)-5-(hydroxymethyl)tetrahydrofuran-3,4-diol **20**

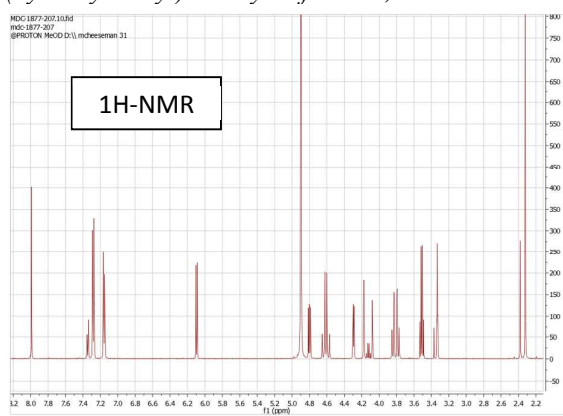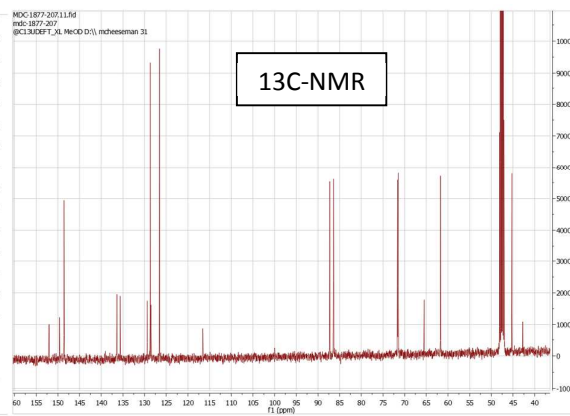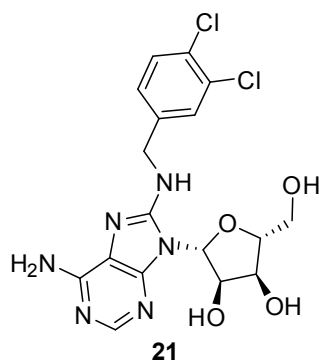

*(2R,3R,4S,5R)*-2-(6-amino-8-((3,4-dichlorobenzyl)amino)-9H-purin-9-yl)-5-(hydroxymethyl)tetrahydrofuran-3,4-diol **21**

AM11960118-v05.10.fid  
AM11960118-v05  
gpractin.DMSO-D<sub>6</sub>, spines 41

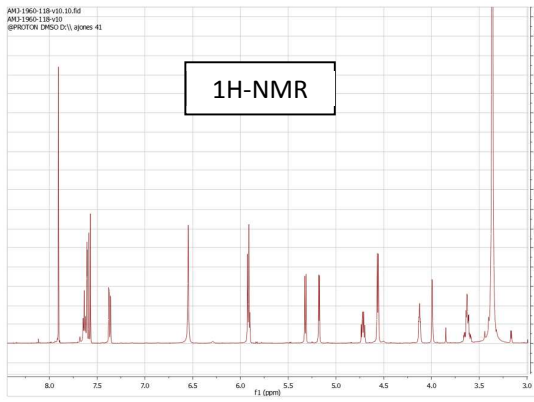

AM11960118-F2-ac.11.fid  
AM11960118-F2-ac  
gpractin.DMSO-D<sub>6</sub>, spines 52

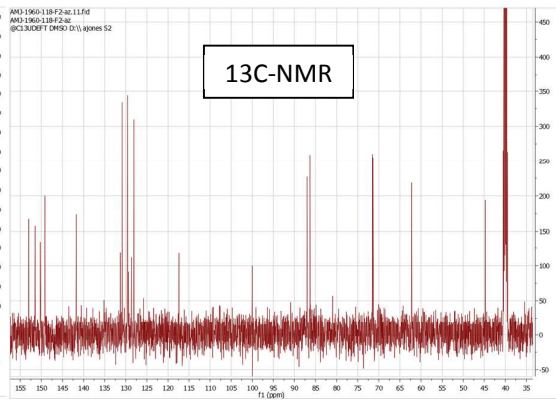

## Representative SPR Sensorgrams and Binding Curves

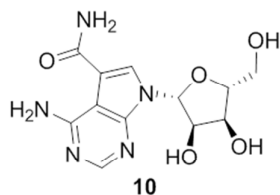

Protein=5206 RU  
 $K_D=3.9 \mu\text{M}$   
 $\text{ExpR}_{\text{max}}=35 \text{ RU}$   
 $\text{ThrR}_{\text{max}}=37 \text{ RU}$   
 Ratio=0.94  
 $\text{Chi}^2=0.10$

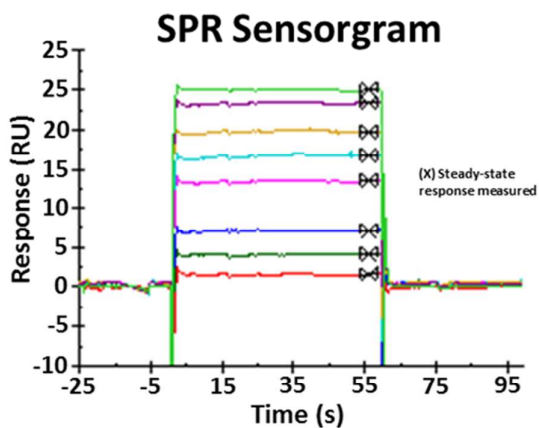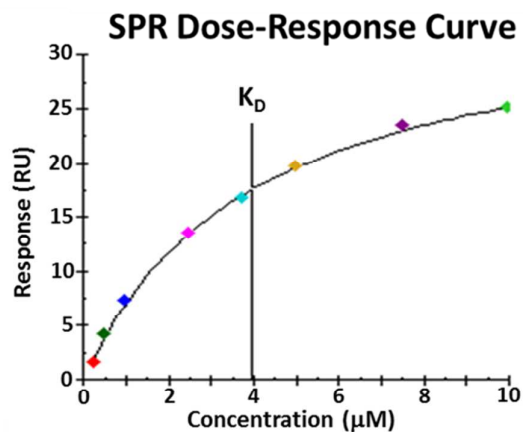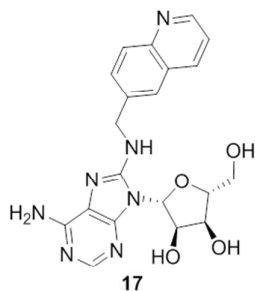

Protein=5118 RU  
 $K_D=0.81 \mu\text{M}$   
 $\text{ExpR}_{\text{max}}=61 \text{ RU}$   
 $\text{ThrR}_{\text{max}}=50 \text{ RU}$   
 Ratio=1.2  
 $\text{Chi}^2=0.04$

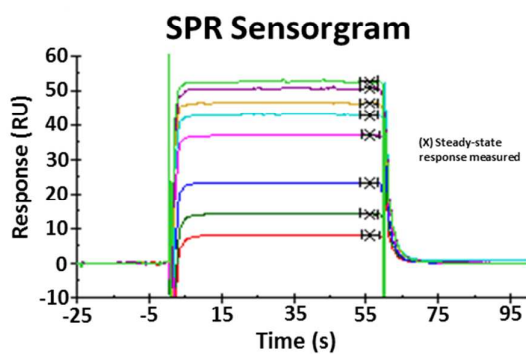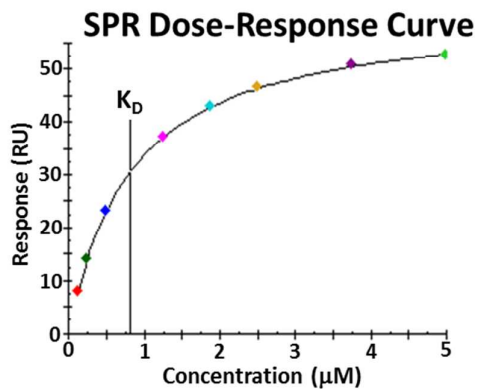

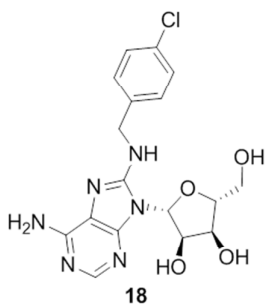

Protein=5118 RU  
 $K_D=0.28 \mu\text{M}$   
 $\text{Exp}R_{\text{max}}=53 \text{ RU}$   
 $\text{Thr}R_{\text{max}}=48 \text{ RU}$   
 Ratio=1.1  
 $\text{Chi}^2=0.09$

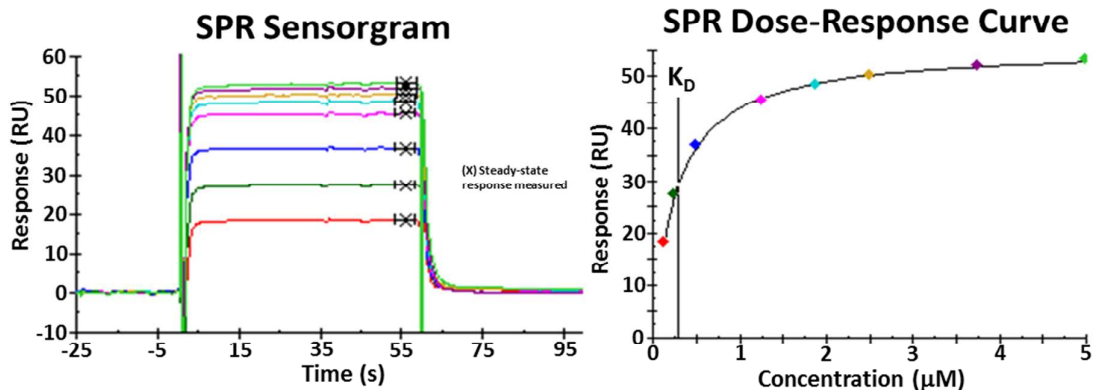

The off-rates for quinoline **17** and *para*-chloro **18** were calculated from the dissociation phase (60-70 s) by fitting the raw data to the first-order rate equation using Excel:

$$R = R_0 \times e^{-k_d(t-t_0)} + R_\infty$$

Quinoline **17**:

$$k_d = 0.45 \text{ s}^{-1} (0.48 - 0.41 \text{ s}^{-1}) \quad r^2 = 0.98$$

$$t_{1/2} = 1.5 \text{ s} (1.4 - 1.7 \text{ s})$$

*Para*-chloro **18**:

$$k_d = 0.36 \text{ s}^{-1} (0.41 - 0.31 \text{ s}^{-1}) \quad r^2 = 0.88$$

$$t_{1/2} = 1.9 \text{ s} (1.7 - 2.2 \text{ s})$$

The 95% confidence intervals of the geometric means are quoted in parenthesis.

**Fo-Fc electron density figures for ligand-bound HSP72 structures**

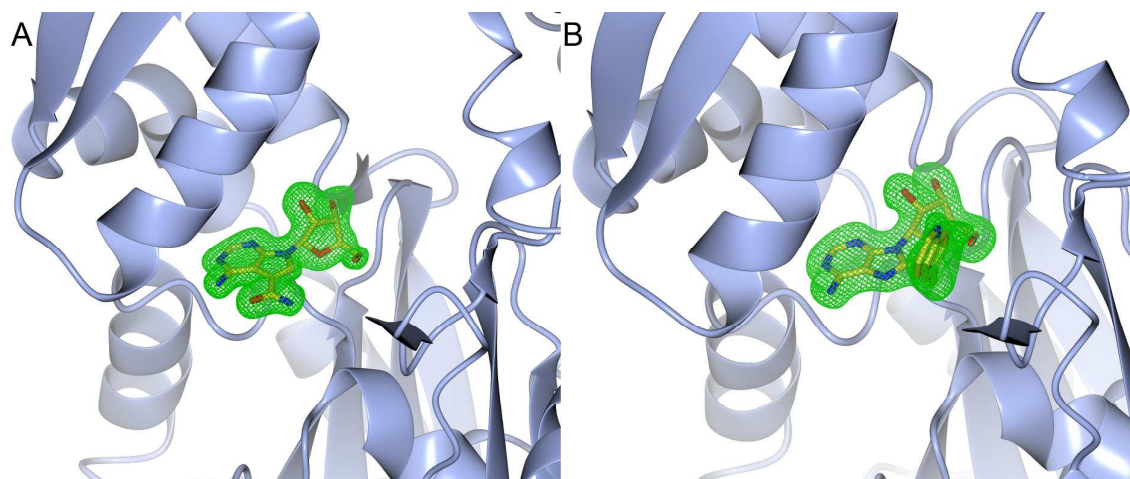

*Fo-Fc electron density maps (green) for HSP72-NBD ligand-bound structures contoured at 3 $\sigma$ . A) Sangivamycin, compound **10**. B) Compound **17** HSP72 (blue) is shown in a ribbon representation.*

**Data collection and refinement statistics for HSP72 co-crystal structures with ligands.**

| <i>Ligand</i>                            | <b>Compound 10</b>                            | <b>Compound 17</b>                            |
|------------------------------------------|-----------------------------------------------|-----------------------------------------------|
| <i>PDB ID</i>                            | <b>5AQZ</b>                                   | <b>5AR0</b>                                   |
| <i>Crystals</i>                          |                                               |                                               |
| Space group                              | P2 <sub>1</sub> 2 <sub>1</sub> 2 <sub>1</sub> | P2 <sub>1</sub> 2 <sub>1</sub> 2 <sub>1</sub> |
| Lattice constants                        |                                               |                                               |
| a (Å)                                    | 47.94                                         | 68.94                                         |
| b (Å)                                    | 89.50                                         | 70.21                                         |
| c (Å)                                    | 96.92                                         | 84.77                                         |
| α (°)                                    | 90                                            | 90                                            |
| β (°)                                    | 90                                            | 90                                            |
| γ (°)                                    | 90                                            | 90                                            |
| <i>Data collection</i>                   |                                               |                                               |
| Beamline                                 | Diamond I04-1                                 | Diamond I24                                   |
| Date of data collection                  | 29-09-2012                                    | 08-12-2012                                    |
| Wavelength (Å)                           | 0.9200                                        | 0.9686                                        |
| Resolution range (Å)                     | 48.46-1.65                                    | 46.49-1.90                                    |
| (highest-resolution shell values)        | (1.68-1.65)                                   | (1.94-1.90)                                   |
| Observations                             | 283187 (10299)                                | 151157 (3296)                                 |
| Unique reflections                       | 50487 (2381)                                  | 25878 (919)                                   |
| Completeness (%) - Inner shell           | 99.7                                          | 99.7                                          |
| Average                                  | 99.1                                          | 89.3                                          |
| Outer shell                              | 97.1                                          | 51.1                                          |
| Multiplicity                             | 5.6 (4.3)                                     | 5.8 (3.6)                                     |
| R <sub>merge</sub> (%)                   | 9.9 (198)                                     | 13.6 (113)                                    |
| I/σ(I)                                   | 5.3 (0.3)                                     | 4.4 (0.6)                                     |
| Mean I/σ(I)                              | 7.1 (0.5)                                     | 7.7 (1.7)                                     |
| CC <sub>1/2</sub> <sup>a</sup>           | 0.997 (0.334)                                 | 0.993 (0.400)                                 |
| Average Mosaicity (°)                    | 0.55                                          | 0.15                                          |
| <i>Structure Solution and Refinement</i> |                                               |                                               |
| No. of copies in ASU                     | 1                                             | 1                                             |
| No. of amino acids                       | 390                                           | 379                                           |
| No. of water molecules                   | 432                                           | 203                                           |
| No. of chloride ions                     | 0                                             | 1                                             |
| No. of ethylene glycol molecules         | 4                                             | 0                                             |
| No. of glycerol molecules                | 0                                             | 3                                             |
| No. of DMSO molecules                    | 0                                             | 2                                             |
| R-factor (%)                             | 18.6                                          | 17.3                                          |
| R <sub>free</sub> (%)                    | 22.1                                          | 21.0                                          |
| <i>Ramachandran plot</i>                 |                                               |                                               |
| Favored (%)                              | 99.0                                          | 99.2                                          |
| Outliers (%)                             | 0.0                                           | 0.0                                           |
| RMSD bonds (Å)                           | 0.010                                         | 0.010                                         |
| RMSD angles (°)                          | 1.01                                          | 1.00                                          |

<sup>a</sup> Half-dataset correlation coefficient, see: Karplus, P. A.; Diederichs, K. Linking Crystallographic Model and Data Quality. *Science* **2012**, *336*, 1030-1033.

References for X-ray Materials and Methods:

- Kabsch, W. Xds. *Acta Crystallogr. Sect. D: Biol. Crystallogr.* **2010**, 66, 125-132.
- Evans, P. Scaling and assessment of data quality. *Acta Crystallogr. Sect. D: Biol. Crystallogr.* **2006**, 62, 72-82.
- Winn, M. D.; Ballard, C. C.; Cowtan, K. D.; Dodson, E. J.; Emsley, P.; Evans, P. R.; Keegan, R. M.; Krissinel, E. B.; Leslie, A. G.; McCoy, A.; McNicholas, S. J.; Murshudov, G. N.; Pannu, N. S.; Potterton, E. A.; Powell, H. R.; Read, R. J.; Vagin, A.; Wilson, K. S. Overview of the CCP4 suite and current developments. *Acta Crystallogr. Sect. D: Biol. Crystallogr.* **2011**, 67, 235-242.
- McCoy, A. J.; Grosse-Kunstleve, R. W.; Adams, P. D.; Winn, M. D.; Storoni, L. C.; Read, R. J. Phaser crystallographic software. *J. Appl. Cryst.* **2007**, 40, 658-674.
- Emsley, P.; Cowtan, K. Coot: model-building tools for molecular graphics. *Acta Crystallogr. Sect. D: Biol. Crystallogr.* **2004**, 60, 2126-2132.
- Bricogne, G.; Blanc, E.; Brandl, M.; Flensburg, C.; Keller, P.; Paciorek, W.; Roversi, P.; Sharff, A.; Smart, O. S.; Vonrhein, C.; Womack, T. O. *BUSTER version 2.11.4. Cambridge, United Kingdom: Global Phasing Ltd., 2012.*
- Adams P. D., Afonine P. V., Bunkóczi G., Chen V. B., Davis I. W., Echols N., Headd J. J., Hung L.-W., Kapral G. J., Grosse-Kunstleve R. W., McCoy A. J., Moriarty N. W., Oeffner R., Read R. J., Richardson D. C., Richardson J. S., Terwilliger T. C., Zwart P. H. PHENIX: a comprehensive Python-based system for macromolecular structure solution. *Acta Crystallogr.* **2010**, D66, 213–221
- Smart, O. S.; Womack, T. O.; Sharff, A.; Flensburg, C.; Keller, P.; Paciorek, W.; Vonrhein, C.; Bricogne, G. *Grade, version 1.2.1. Cambridge, United Kingdom: Global Phasing Ltd.,* <http://www.globalphasing.com>, 2012.
- Bruno, I. J.; Cole, J. C.; Lommerse, R. S.; Rowland, R.; Taylor, R.; Verdonk, M. L. Isostar: A library of information about non-bonded interactions. *J. Comp.-Aided. Mol. Des.* **1997**, 11, 525-537.
- Davis, I. W.; Leaver-Fay, A.; Chen, V. B.; Block, J. N.; Kapral, G. J.; Wang, X.; Murray, L. W.; Arendall, W. B., 3rd; Snoeyink, J.; Richardson, J. S.; Richardson, D. C. MolProbity: all-atom contacts and structure validation for proteins and nucleic acids. *Nucleic Acids Res.* **2007**, 35, W375-W383.
- Potterton, E.; McNicholas, S.; Krissinel, E.; Cowtan, K.; Noble, M. The CCP4 molecular-graphics project. *Acta Crystallogr D Biol Crystallogr* **2002**, 58, 1955-7.



## Complete Binding Contacts of Nucleoside ligands for HSP70

**Figure S1** All Close Contacts in the Sangivamycin **10**/HSP72-NBD Co-Crystal Structure

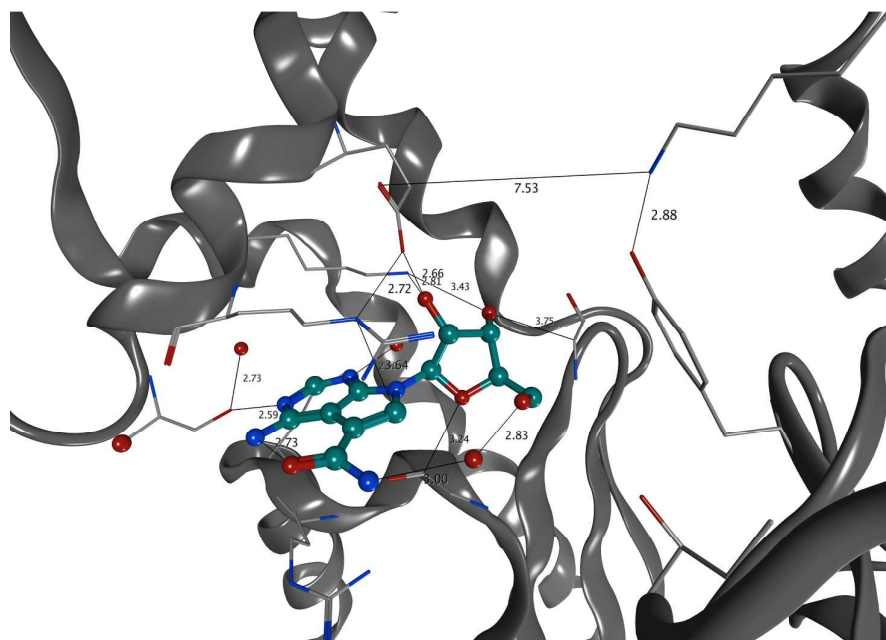

*All distances are in Angstroms. The red spheres represent water molecules*

**Figure S2** All Close Contacts in the Quinoline **17**/HSP72-NBD Co-Crystal Structure

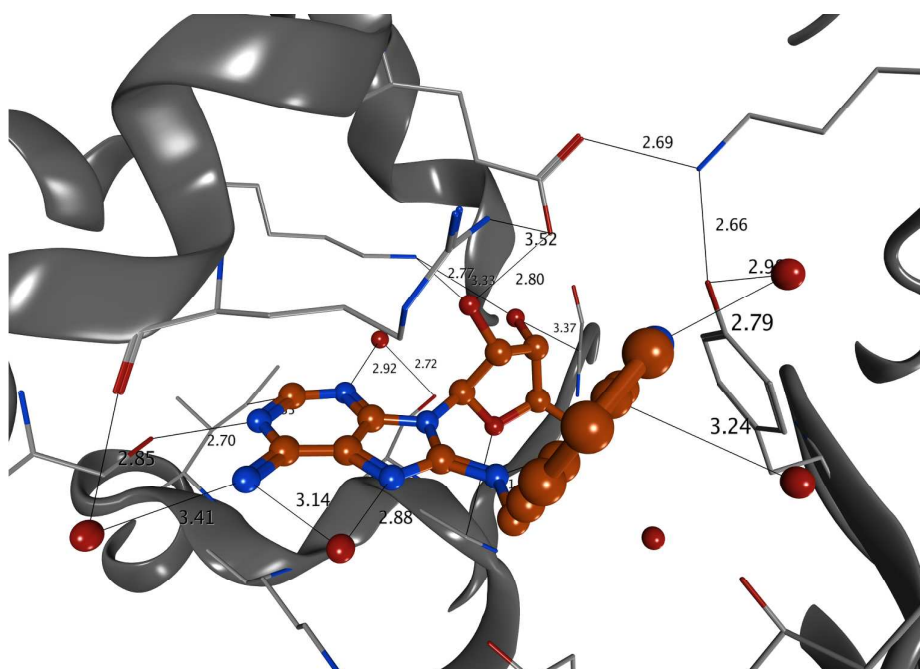

*All distances are in Angstroms. The red spheres represent water molecules*

**Figure S3** Overlay of ADP/Pi HSP-72 NBD co-crystal structure (copper) and Sangivamycin **10** HSP72 NBD co-crystal (white) highlighting all key binding residues

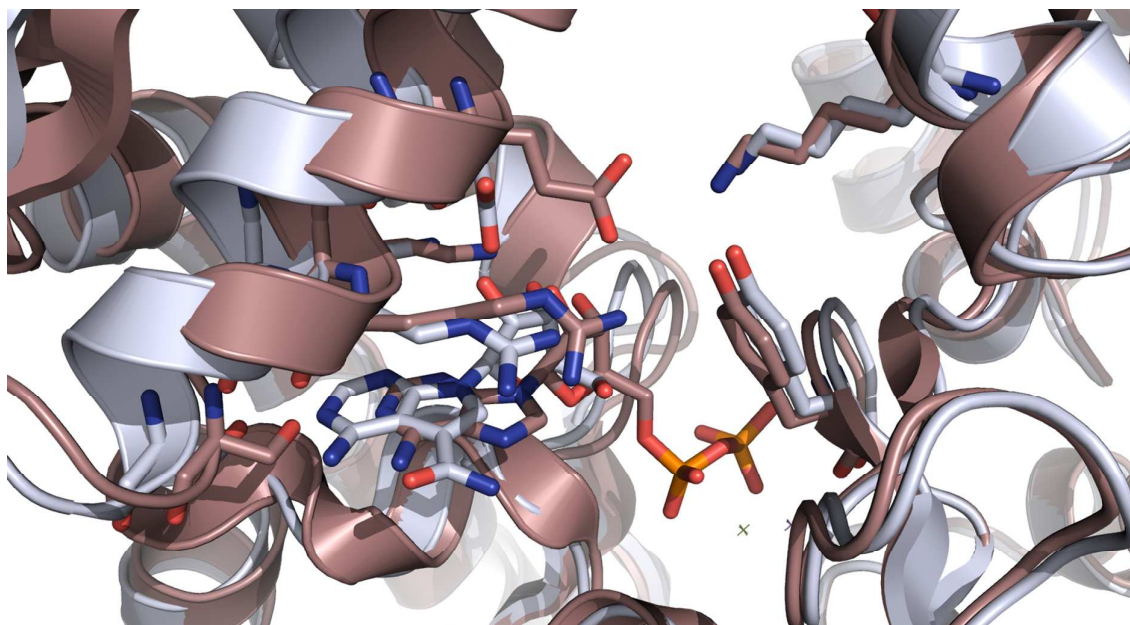

**Figure S4** Overlay of ADP/Pi HSP-72 NBD co-crystal structure (copper) and 8-Quinoline **17** HSP72 NBD co-crystal (grey) highlighting all key binding residues

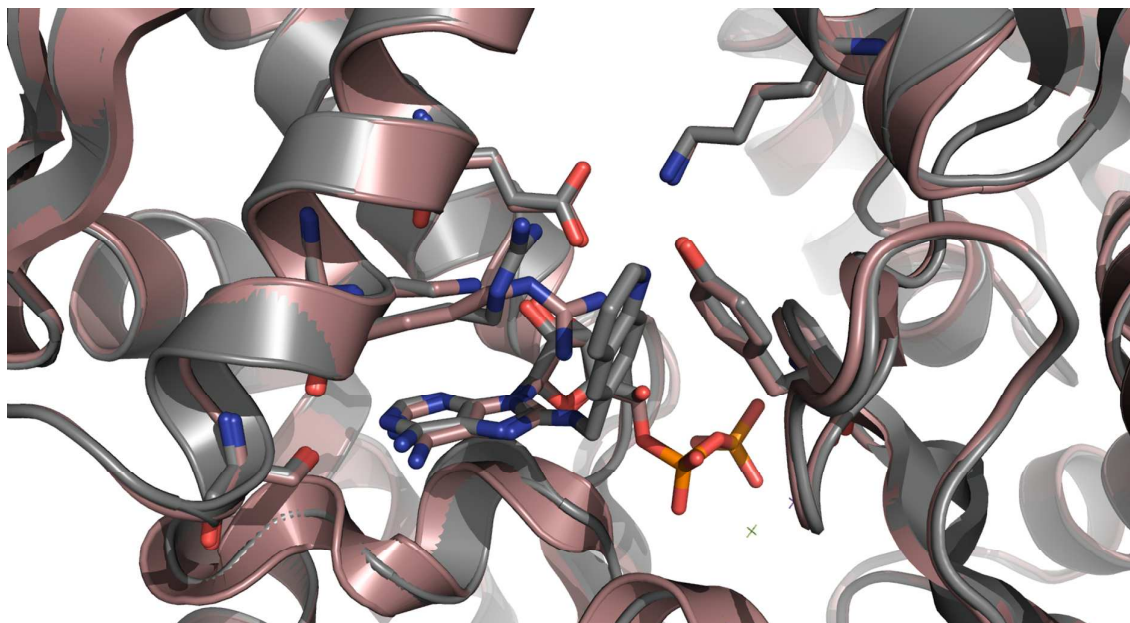

**Figure S5** Overlay of Sangivamycin **10** HSP-72 NBD co-crystal structure (white) and 8-Quinoline **17** HSP72 NBD co-crystal (grey) highlighting all key binding residues

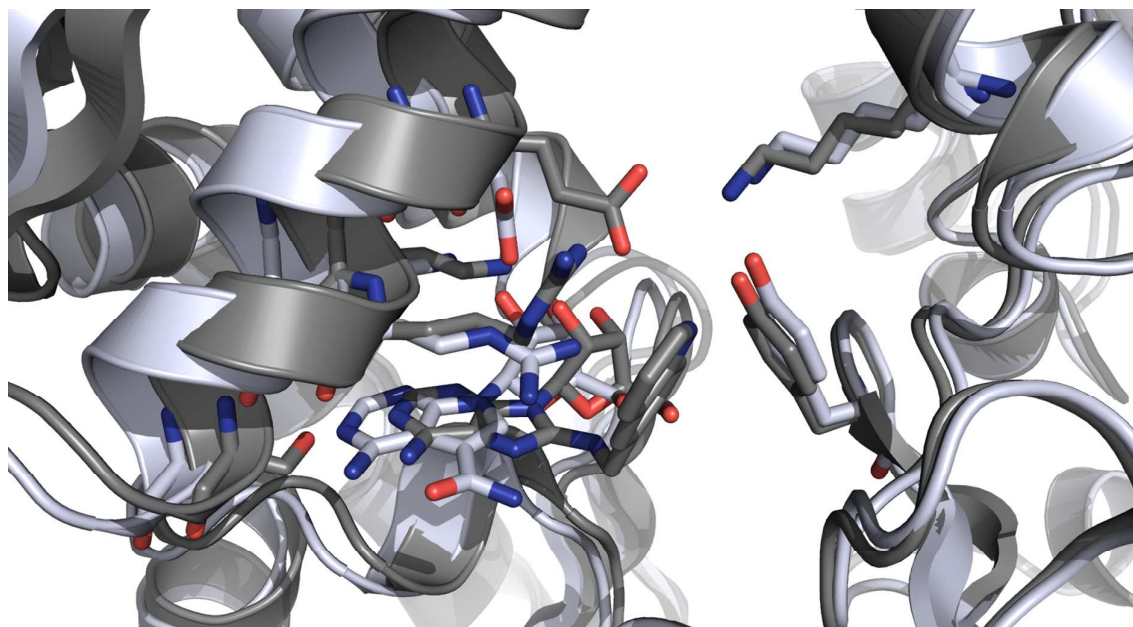

Supplement: jm5b02001_si_001.pdf [file jm5b02001_si_001.pdf]
